# Supplementary material for: Systemic Anti-Cancer Therapy and Metastatic Cancer Are Independent Mortality Risk Factors during Two UK Waves of the COVID-19 Pandemic at University College London Hospital
Source: MDPI journal article supplement (doi:10.3390/cancers13236085), 2021-12-02
Supplement: s1 [file s1]

## Supplementary Information

### Supplementary Table S1: Comparison of cancer-specific characteristics in wave 1 and

2. Data is shown as n (%). P-value significance level is indicated for the combined cancer cohort in each wave.

|                                | Wave 1 (n = 94) | Wave 2 (n = 113) | p-value |
|--------------------------------|-----------------|------------------|---------|
| <b>Primary site</b>            |                 |                  |         |
| <b>Gastrointestinal</b>        | 23 (24.5%)      | 29 (25.7%)       | 0.84    |
| <b>Gynaecological</b>          | 9 (9.6%)        | 11 (9.7%)        | 0.97    |
| <b>Genitourinary</b>           | 24 (25.5%)      | 27 (23.9%)       | 0.79    |
| <b>Thoracic</b>                | 15 (16.0%)      | 13 (11.5%)       | 0.35    |
| <b>Breast</b>                  | 8 (8.5%)        | 14 (12.4%)       | 0.37    |
| <b>Other</b>                   | 15 (16.0%)      | 19 (16.8%)       | 0.86    |
| <b>Active malignancy</b>       | 58 (61.7%)      | 70 (61.9%)       | 0.84    |
| <b>Remission</b>               | 50 (53.2%)      | 41 (36.3%)       |         |
| <b>Metastatic malignancy</b>   | 19 (20.2%)      | 28 (24.8%)       | 0.42    |
| <b>SACT</b>                    | 25 (26.6%)      | 33 (29.2%)       | 0.72    |
| <b>Cytotoxic chemotherapy</b>  | 16 (17.0%)      | 24 (21.2%)       | 0.44    |
| <b>Palliative chemotherapy</b> | 9 (9.6%)        | 16 (14.2%)       | 0.31    |
| <b>Immunotherapy</b>           | 4 (4.3%)        | 1 (0.9%)         | 0.11    |
| <b>Targeted therapy</b>        | 1 (1.1%)        | 7 (6.2%)         | 0.06    |
| <b>Endocrine therapy</b>       | 8 (8.5%)        | 7 (6.2%)         | 0.51    |
| <b>Surgery</b>                 | 3 (3.2%)        | 5 (4.4%)         | 0.66    |

### Supplementary Table S2: Univariate analysis of general and cancer-specific variables

among patients with cancer. Table shows the hazard ratios (HR) from univariate analyses of risk factors associated with mortality in COVID-19. 95% confidence interval for each HR is shown alongside p-value.

| Title                       | HR (95% CI for HR) | p-value |
|-----------------------------|--------------------|---------|
| <b>Age (every 10 years)</b> | 1.41 (1.15-1.73)   | <0.001  |
| <b>Male sex</b>             | 1.51 (0.86-2.66)   | 0.15    |
| <b>South Asian</b>          | 1.79 (0.9-3.56)    | 0.10    |
| <b>Black</b>                | 0.5 (0.15-1.59)    | 0.24    |
| <b>White</b>                | 0.73 (0.43-1.25)   | 0.25    |
| <b>Other</b>                | 1.54 (0.75-3.14)   | 0.24    |
| <b>BMI</b>                  | 0.98 (0.94-1.03)   | 0.43    |
| <b>Ex-or-active smoker</b>  | 1.07 (0.63-1.84)   | 0.80    |

|                                     |                   |       |
|-------------------------------------|-------------------|-------|
| <b>Dementia</b>                     | 1 (0.4-2.5)       | 1.00  |
| <b>Diabetes</b>                     | 1.01 (0.55-1.84)  | 0.98  |
| <b>Immunosuppression</b>            | 3.17 (0.77-13.13) | 0.11  |
| <b>Congestive cardiac failure</b>   | 0.9 (0.33-2.49)   | 0.84  |
| <b>Liver impairment</b>             | 0.85 (0.12-6.13)  | 0.87  |
| <b>Hypertension</b>                 | 1.55 (0.92-2.59)  | 0.10  |
| <b>Peripheral vascular disease</b>  | 1.05 (0.25-4.29)  | 0.95  |
| <b>Stroke</b>                       | 1.58 (0.8-3.14)   | 0.19  |
| <b>Chronic lung disease</b>         | 1.1 (0.56-2.18)   | 0.78  |
| <b>Chronic kidney disease</b>       | 1.24 (0.61-2.52)  | 0.56  |
| <b>Steroid therapy in progress</b>  | 1.08 (0.26-4.42)  | 0.92  |
| <b>Cardiovascular disease</b>       | 1.32 (0.73-2.38)  | 0.35  |
| <b>Other co-morbidity</b>           | 0.8 (0.45-1.4)    | 0.43  |
| <b>Wave 2</b>                       | 0.41 (0.23-0.71)  | <0.01 |
| <b>Gastrointestinal</b>             | 1.16 (0.67-2.03)  | 0.60  |
| <b>Gynaecological</b>               | 1.01 (0.36-2.78)  | 0.99  |
| <b>Genito-urinary</b>               | 1.34 (0.77-2.34)  | 0.31  |
| <b>Thoracic</b>                     | 0.97 (0.46-2.05)  | 0.94  |
| <b>Breast</b>                       | 0.66 (0.24-1.84)  | 0.43  |
| <b>Other</b>                        | 0.61 (0.26-1.42)  | 0.25  |
| <b>Adenocarcinoma</b>               | 1.03 (0.6-1.76)   | 0.92  |
| <b>Squamous</b>                     | 0.83 (0.41-1.71)  | 0.62  |
| <b>Other</b>                        | 1.11 (0.61-1.99)  | 0.74  |
| <b>Metastatic disease</b>           | 1.61 (0.91-2.83)  | 0.10  |
| <b>Any anti-cancer therapy</b>      | 1.11 (0.64-1.95)  | 0.71  |
| <b>Systemic anti-cancer therapy</b> | 1.44 (0.82-2.53)  | 0.20  |
| <b>Cytotoxic chemotherapy</b>       | 1.17 (0.6-2.26)   | 0.64  |
| <b>Neo/adjuvant chemotherapy</b>    | 0.57 (0.14-2.34)  | 0.43  |
| <b>Palliative chemotherapy</b>      | 1.54 (0.75-3.13)  | 0.24  |
| <b>Immunotherapy</b>                | 1.45 (0.35-5.94)  | 0.61  |
| <b>Targeted therapy</b>             | 0.61 (0.08-4.41)  | 0.62  |
| <b>Endocrine therapy</b>            | 1.64 (0.71-3.83)  | 0.25  |
| <b>Radiotherapy</b>                 | 1.46 (0.46-4.69)  | 0.52  |
| <b>Surgery</b>                      | 0.31 (0.04-2.28)  | 0.25  |
